# Supplementary material for: Dietary Patterns Related to Triglyceride and High-Density Lipoprotein Cholesterol and the Incidence of Type 2 Diabetes in Korean Men and Women
Source: MDPI journal article supplement (doi:10.3390/nu11010008), 2018-12-20
Supplement: s1 [file s1]

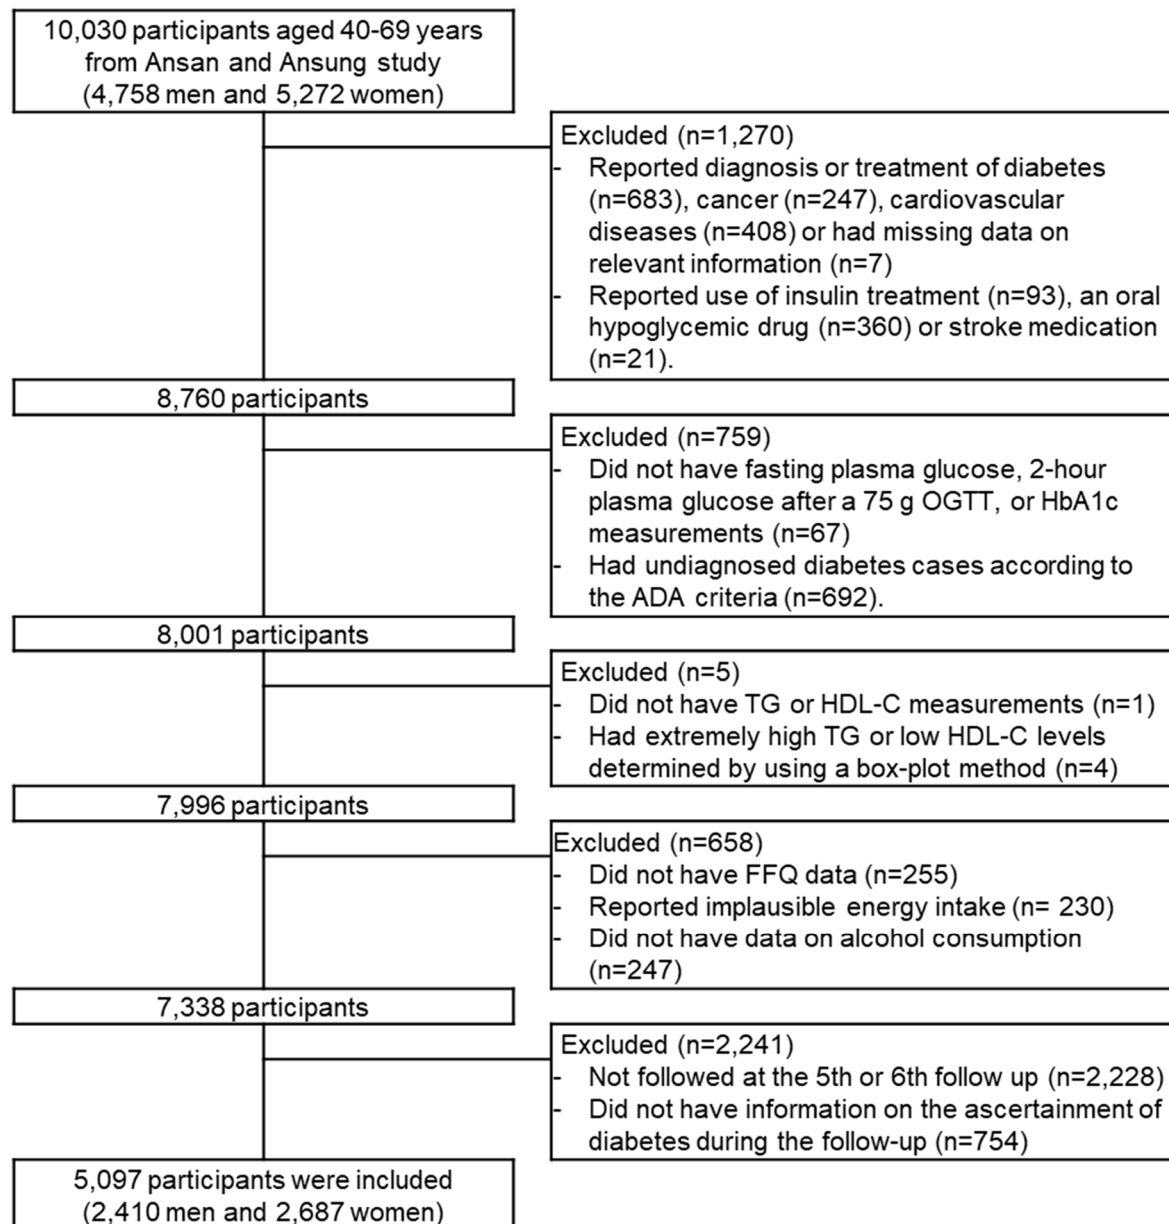

**Figure S1.** Flow diagram of inclusion for study participants. Abbreviations: OGTT, oral glucose tolerance test; HbA1c, hemoglobin A1c; ADA, American Diabetes Association; TG, triglyceride; HDL-C, high-density lipoprotein cholesterol; FFQ, food frequency questionnaire.

**Table S1.** Odds ratios (ORs) and 95% confidence intervals (CIs) of incident type 2 diabetes according to the quintiles of TG/HDL-C ratio-related dietary pattern after excluding incident cases during 2 years of follow up.

|                                           | Quintiles of TG/HDL-C ratio-related dietary pattern scores |                  |                  |                  |                  | <i>p</i> for trend |
|-------------------------------------------|------------------------------------------------------------|------------------|------------------|------------------|------------------|--------------------|
|                                           | Quintile1                                                  | Quintile2        | Quintile3        | Quintile4        | Quintile5        |                    |
| Men ( <i>n</i> = 2298)                    |                                                            |                  |                  |                  |                  |                    |
| Case/noncase                              | 81 / 378                                                   | 86 / 374         | 85 / 375         | 86 / 374         | 110 / 349        |                    |
| Unadjusted model                          | Reference                                                  | 1.07 (0.77–1.50) | 1.06 (0.76–1.48) | 1.07 (0.77–1.50) | 1.47 (1.07–2.03) | 0.017              |
| Age-adjusted model                        | Reference                                                  | 1.08 (0.77–1.51) | 1.06 (0.75–1.48) | 1.07 (0.77–1.50) | 1.46 (1.06–2.01) | 0.021              |
| Multivariate adjusted model1 <sup>a</sup> | Reference                                                  | 1.11 (0.79–1.57) | 1.09 (0.77–1.54) | 1.11 (0.79–1.56) | 1.56 (1.12–2.18) | 0.010              |
| Multivariate adjusted model2 <sup>b</sup> | Reference                                                  | 1.10 (0.78–1.56) | 1.06 (0.74–1.50) | 1.04 (0.74–1.47) | 1.51 (1.08–2.11) | 0.023              |
| Women ( <i>n</i> = 2606)                  |                                                            |                  |                  |                  |                  |                    |
| Case/noncase                              | 75 / 447                                                   | 64 / 452         | 99 / 424         | 96 / 455         | 94 / 400         |                    |
| Unadjusted model                          | Reference                                                  | 0.84 (0.59–1.21) | 1.39 (1.00–1.93) | 1.26 (0.91–1.75) | 1.40 (1.01–1.95) | 0.007              |
| Age-adjusted model                        | Reference                                                  | 0.84 (0.59–1.20) | 1.39 (1.00–1.93) | 1.21 (0.87–1.68) | 1.29 (0.92–1.80) | 0.025              |
| Multivariate adjusted model1 <sup>c</sup> | Reference                                                  | 0.82 (0.57–1.19) | 1.38 (0.99–1.94) | 1.17 (0.82–1.67) | 1.28 (0.90–1.84) | 0.039              |
| Multivariate adjusted model2 <sup>b</sup> | Reference                                                  | 0.79 (0.54–1.14) | 1.31 (0.93–1.84) | 1.07 (0.74–1.53) | 1.15 (0.80–1.65) | 0.155              |

Abbreviations: TG, triglyceride; HDL-C, high-density lipoprotein cholesterol. <sup>a</sup> Adjusted for age (continuous, years), living area (Ansan and Ansong), energy intake (continuous, kcal/day), pack-years of smoking (0, >0 and <15, 15–<30, and 30≤ pack-years), alcohol consumption (0, >0 and <5, 5–<15, 15–<30 and 30≤ g/day), family history of diabetes (yes, no), hypertension or hyperlipidemia at baseline (yes, no), and physical activity (continuous, metabolic equivalents–hours/week). <sup>b</sup> Further adjusted for BMI (continuous, kg/m<sup>2</sup>) in addition to the variables included in Model 1. <sup>c</sup> Adjusted for age (years), living area (Ansan and Ansong), energy intake (continuous, kcal/day), menopausal status (pre and postmenopausal status), smoking status (ever and never), alcohol consumption status (ever and never), family history of diabetes (yes, no), hypertension or hyperlipidemia at baseline (yes, no), and physical activity (continuous, metabolic equivalents–hours/week).
